# Supplementary material for: An invasive shrub Lantana camara L. alters the flora and soils in tropical dry deciduous forests of Central India
Source: Research Square preprint supplement (doi:10.21203/rs.3.rs-223195/v1), 2021-02-17
Supplement: Supplementary file 1 [file 6efb1ba224a565179d5cb1b9.docx]

**Supplementary file 1.** Mean density (No. ha-1), basal area (m2 ha-1) and Importance Value Index (IVI) of different life forms in uninvaded (UI) and *Lantana*-invaded (LI) sites of tropical dry deciduous forests of Sagar, Madhya Pradesh

| **Life form** | **Density** | | **Basal area** | | **IVI** | |
| --- | --- | --- | --- | --- | --- | --- |
| **Saplings** | **UI** | **LI** | **UI** | **LI** | **UI** | **LI** |
| *Acacia catechu* (L.f.) Willd. |  | 0.27 |  | 0.0001 |  | 1.23 |
| *Acacia leucophloea* (Roxb.)Willd. | 0.27 | 0.27 | 0.0001 | 0.0001 | 0.42 | 1.16 |
| *Aegle marmelos* (L.) Correa | 0.80 |  | 0.0004 |  | 3.78 |  |
| *Anogeissus latifolia* (DC.) Wallich ex Guill. & Perr. | 2.40 |  | 0.0012 |  | 9.90 |  |
| *Bauhinia racemosa* Lam. |  | 0.27 |  | 0.0002 |  | 4.21 |
| *Bridelia retusa* (L.) A.Juss. | 0.27 |  | 0.0001 |  | 0.56 |  |
| *Buchanania lanzan* Spreng | 1.07 |  | 0.0005 |  | 1.82 |  |
| *Butea monosperma* (Lam.) Taub. | 1.33 | 0.53 | 0.0008 | 0.0002 | 3.23 | 2.19 |
| *Cassia fistula* L. | 2.93 | 4.00 | 0.0012 | 0.0019 | 11.89 | 54.65 |
| *Dalbergia paniculata* (Roxb) | 1.87 |  | 0.0007 |  | 3.14 |  |
| *Diospyros melanoxylon* Roxb | 29.07 | 9.07 | 0.0141 | 0.0045 | 51.23 | 93.85 |
| *Flacourtia indica* (Burm. f.) Merr. | 0.53 |  | 0.0003 |  | 5.04 |  |
| *Garuga pinnata* Roxb. | 2.93 | 0.53 | 0.0015 | 0.0003 | 27.26 | 15.98 |
| *Grewia tiliifolia* Vahl. var. tilifolia | 0.53 |  | 0.0003 |  | 0.85 |  |
| *Kydia calycina* Roxb*.* | 0.27 |  | 0.0002 |  | 0.43 |  |
| *Lagerstroemia parviflora* Roxb | 4.80 | 0.80 | 0.0025 | 0.0004 | 13.56 | 10.55 |
| *Miliusa tomentosa* (Roxb.) J. Sinclair | 18.93 | 1.87 | 0.0097 | 0.0010 | 30.34 | 20.37 |
| *Ougeinia oojeinensis* (Roxb.)Hochr*.* | 0.80 |  | 0.0004 |  | 1.39 |  |
| *Schleichera oleosa* (Lour.) Oken. | 1.33 | 0.27 | 0.0006 | 0.0001 | 2.15 | 4.03 |
| *Semecarpus anacardium* L.f. | 0.27 |  | 0.0001 |  | 1.54 |  |
| *Syzygium cumini* (L.) Skeel | 14.13 |  | 0.0069 |  | 12.13 |  |
| *Tectona grandis* L.f. | 24.00 | 8.53 | 0.0121 | 0.0042 | 117.36 | 64.70 |
| *Terminalia tomentosa* Wight & Arn. |  | 0.53 |  | 0.0003 |  | 4.24 |
| *Wrightia tinctora*(Roxb) | 0.27 | 2.40 | 0.0002 | 0.0014 | 2.00 | 22.84 |
| **Juveniles** |  |  |  |  |  |  |
| *Acacia catechu* (L.f.) Willd. | 0.53 | 1.87 | 0.0027 | 0.0045 | 1.74 | 1.29 |
| *Acacia leucophloea* (Roxb.)Willd. | 3.73 | 5.33 | 0.0124 | 0.0185 | 3.18 | 4.91 |
| *Aegle marmelos* (L.) Correa | 3.20 | 2.93 | 0.0106 | 0.0119 | 4.58 | 3.72 |
| *Annona squamosa* L. | 2.93 |  | 0.0065 |  | 0.75 |  |
| *Anogeissus latifolia* (DC.) Wallich ex Guill. & Perr. | 9.07 | 8.00 | 0.0272 | 0.0299 | 5.94 | 5.81 |
| *Azadirachta indica* A.Juss. |  | 0.27 |  | 0.0005 |  | 0.32 |
| *Bauhinia racemosa* Lam. | 3.20 | 1.60 | 0.0142 | 0.0057 | 1.81 | 1.55 |
| *Bridelia retusa* (L.) A.Juss. | 1.33 | 0.53 | 0.0049 | 0.0039 | 0.78 | 0.91 |
| *Buchanania lanzan* Spreng | 9.33 | 2.67 | 0.0371 | 0.0136 | 6.12 | 2.97 |
| *Butea monosperma* (Lam.) Taub. | 34.93 | 15.73 | 0.1119 | 0.0562 | 21.15 | 17.52 |
| *Casearia tomentosa*Roxb*.* |  | 0.27 |  | 0.0003 |  | 0.18 |
| *Cassia fistula L.* | 10.13 | 11.20 | 0.0323 | 0.0297 | 6.67 | 14.95 |
| *Chloroxylon swietenia* (Roxb.) DC. |  | 0.53 |  | 0.0024 |  | 0.48 |
| *Cochlospermum religiosum* (L.) Alston | 0.27 | 0.27 | 0.0016 | 0.0014 | 0.19 | 0.25 |
| *Cordia myxa* L*.* | 0.53 |  | 0.0015 |  | 0.21 |  |
| *Dalbergia paniculata* (Roxb) | 0.80 |  | 0.0020 |  | 0.30 |  |
| *Diospyros melanoxylon* Roxb | 203.47 | 98.40 | 0.6035 | 0.3143 | 72.17 | 57.05 |
| *Elaedendron Glaucum* (Rottb.) Pers. | 0.27 |  | 0.0017 |  | 0.16 |  |
| *Ficus glomerata* Roxb. | 1.07 | 0.53 | 0.0046 | 0.0007 | 0.41 | 0.25 |
| *Flacourtia indica* (Burm. f.) Merr. | 5.87 | 1.60 | 0.0227 | 0.0066 | 5.44 | 2.39 |
| *Garuga pinnata* Roxb. | 7.20 | 7.47 | 0.0095 | 0.0183 | 2.85 | 5.06 |
| *Grewia tiliifolia* Vahl. var. tilifolia |  | 0.53 |  | 0.0005 |  | 0.23 |
| *Holoptelea integrifolia* Planch. | 0.27 | 0.53 | 0.0002 | 0.0007 | 0.22 | 0.50 |
| *Kydia calycina* Roxb. | 0.27 |  | 0.0004 |  | 0.15 |  |
| *Lagerstroemia parviflora* Roxb. | 30.93 | 31.47 | 0.0882 | 0.1048 | 18.34 | 31.37 |
| *Lannea coromandelica* (Houtt.)Merr. | 0.27 | 0.27 | 0.0010 | 0.0020 | 0.21 | 0.27 |
| *Madhuca indica* J.F.Gmel. | 0.27 | 0.27 | 0.0008 | 0.0010 | 0.14 | 0.22 |
| *Miliusa tomentosa* (Roxb.) J. Sinclair | 65.60 | 26.13 | 0.1667 | 0.0728 | 23.03 | 14.52 |
| *Ougeinia oojeinensis* (Roxb.)Hochr. |  | 0.53 |  | 0.0026 |  | 1.00 |
| *Schleichera oleosa* (Lour.) Oken. | 6.67 | 0.80 | 0.0193 | 0.0033 | 2.88 | 0.71 |
| *Semecarpus anacardium* L.f. | 5.07 | 2.40 | 0.0144 | 0.0073 | 2.63 | 1.46 |
| *Syzygium cumini* (L.) Skeel | 28.00 |  | 0.0651 |  | 7.30 |  |
| *Tectona grandis* L.f. | 174.93 | 144.53 | 0.5893 | 0.4745 | 100.91 | 123.22 |
| *Terminalia arjuna* (Roxb.) Wight & Arn. | 0.80 |  | 0.0024 |  | 0.38 |  |
| *Terminalia tomentosa* Wight & Arn. | 8.53 | 1.87 | 0.0272 | 0.0070 | 5.47 | 1.98 |
| *Wrightia tinctora* (Roxb.) | 3.47 | 3.20 | 0.0089 | 0.0078 | 2.66 | 3.18 |
| *Ziziphus jujuba* Mill. | 0.27 |  | 0.0012 |  | 0.83 |  |
| *Ziziphus xylopyrus* (Retz.) Willd. | 0.27 | 1.87 | 0.0017 | 0.0045 | 0.19 | 1.76 |
| **Adults** |  |  |  |  |  |  |
| *Acacia catechu* (L.f.) Willd. | 0.80 | 1.33 | 0.0202 | 0.0379 | 0.58 | 1.23 |
| *Acacia leucophloea* (Roxb.) Willd*.* | 2.93 | 4.80 | 0.1877 | 0.2181 | 2.96 | 5.53 |
| *Adina cordifolia* (Roxb.) Brandis | 0.27 |  | 0.0120 |  | 0.23 |  |
| *Aegle marmelos* (L.) Correa | 4.80 | 5.87 | 0.1900 | 0.2797 | 3.88 | 5.45 |
| *Albizia procera* (Roxb.) Benth | 0.27 | 0.27 | 0.0114 | 0.0393 | 0.26 | 0.54 |
| *Anogeissus latifolia* (DC.) Wallich ex Guill. & Perr. | 12.53 | 10.40 | 0.4784 | 0.4464 | 9.10 | 11.25 |
| *Bauhinia racemosa* Lam. | 4.53 | 2.40 | 0.0976 | 0.0629 | 2.57 | 2.07 |
| *Bridelia retusa* (L.) A.Juss. | 0.53 |  | 0.0349 |  | 0.55 |  |
| *Buchanania lanzan* Spreng | 29.07 | 12.80 | 0.9393 | 0.4737 | 18.29 | 10.91 |
| *Butea monosperma* (Lam.) Taub. | 36.80 | 27.20 | 1.8072 | 1.6080 | 30.83 | 31.47 |
| *Cassia fistula* L. | 0.80 | 1.60 | 0.0127 | 0.0268 | 0.52 | 1.38 |
| *Chloroxylon swietenia* (Roxb.) DC*.* | 0.27 |  | 0.0050 |  | 0.25 |  |
| *Cordia myxa* L. |  | 0.53 |  | 0.0385 |  | 0.55 |
| *Dalbergia paniculata* (Roxb) | 1.60 | 0.53 | 0.2153 | 0.0395 | 1.90 | 0.57 |
| *Diospyros melanoxylon* Roxb. | 45.87 | 23.73 | 1.1782 | 0.5107 | 27.96 | 19.32 |
| *Elaedendron Glaucum* (Rottb.) Pers. | 0.27 |  | 0.0032 |  | 0.36 |  |
| *Feronia elephantum* Corrêa | 0.27 |  | 0.0130 |  | 0.24 |  |
| *Ficus glomerata* Roxb*.* | 1.60 |  | 0.0789 |  | 1.08 |  |
| *Ficus religiosa* L. | 0.27 | 2.67 | 0.3443 | 0.8126 | 1.44 | 4.98 |
| *Flacourtia indica* (Burm. f.) Merr. | 6.67 | 2.40 | 0.1406 | 0.0760 | 3.76 | 2.23 |
| *Gardenia latifolia* Aiton | 0.27 | 1.60 | 0.0201 | 0.1034 | 0.32 | 1.88 |
| *Garuga pinnata* Roxb. | 0.80 | 0.80 | 0.0564 | 0.0116 | 2.29 | 0.73 |
| *Holoptelea integrifolia* Planch. | 0.27 |  | 0.0045 |  | 0.19 |  |
| *Lagerstroemia parviflora* Roxb. | 21.87 | 16.80 | 0.7556 | 0.7334 | 15.92 | 15.11 |
| *Lannea coromandelica* (Houtt.)Merr. | 3.47 | 8.80 | 0.2668 | 0.4977 | 4.60 | 9.92 |
| *Madhuca indica* J.F.Gmel. | 0.80 | 2.67 | 0.0790 | 0.2384 | 1.05 | 3.33 |
| *Mangifera indica* L. | 0.27 |  | 0.0100 |  | 0.27 |  |
| *Miliusa tomentosa* (Roxb.) J. Sinclair | 13.60 | 5.60 | 0.3547 | 0.0705 | 9.03 | 3.94 |
| *Mitragyna parvifolia* (Roxb.) Korth. | 0.27 |  | 0.0150 |  | 0.23 |  |
| *Ougeinia oojeinensis* (Roxb.) Hochr. |  | 1.07 |  | 0.0692 |  | 1.19 |
| *Phyllanthus emblica* L. | 1.87 | 0.27 | 0.1076 | 0.0196 | 1.63 | 0.30 |
| *Pterocarpus marsupium* Roxb. | 0.53 | 0.53 | 0.0296 | 0.0381 | 0.45 | 0.75 |
| *Schleichera oleosa* (Lour.) Oken. | 4.00 | 2.40 | 0.1341 | 0.1109 | 2.82 | 2.69 |
| *Semecarpus anacardium* L.f. | 2.93 | 1.60 | 0.0898 | 0.0891 | 2.37 | 2.01 |
| *Syzygium cumini* (L.) Skeel | 0.27 |  | 0.0046 |  | 0.25 |  |
| *Sterculia urens* Roxb. | 3.47 |  | 0.1234 |  | 3.21 |  |
| *Tamarandus indicus* L. | 0.27 |  | 0.0022 |  | 0.24 |  |
| *Tectona grandis* L.f. | 231.73 | 184.53 | 9.3240 | 7.5052 | 126.46 | 151.01 |
| *Terminalia arjuna* (Roxb.) Wight & Arn. | 7.20 | 0.27 | 1.6294 | 0.0337 | 9.63 | 0.44 |
| *Terminalia tomentosa* Wight & Arn. | 11.47 | 6.40 | 0.8912 | 0.4773 | 11.57 | 8.00 |
| *Wrightia tinctora* (Roxb) | 0.80 | 1.33 | 0.0128 | 0.0198 | 0.54 | 1.22 |
| *Ziziphus xylopyrus* (Retz.)Wild. | 0.27 |  | 0.0025 |  | 0.16 |  |
| **Shrubs and Lianas** |  |  |  |  |  |  |
| *Adhatoda vasica*Nees | 10.67 |  | 0.0005 |  | 1.65 |  |
| *Carissa spinarum*var. spinarum | 21.33 |  | 0.0016 |  | 6.84 |  |
| *Cayratia triflora (*L.*)*Domin | 16.00 | 85.33 | 0.0001 | 0.0006 | 1.93 | 3.31 |
| [*Desmodium gangeticum* (L.)DC.](https://indiabiodiversity.org/species/show/229507) | 202.67 |  | 0.0010 |  | 15.82 |  |
| *Helicteres isora* L. | 10.67 |  | 0.0021 |  | 3.04 |  |
| *Hemidesmus indicus* (L.)R. Br. | 1461.33 | 608.00 | 0.0354 | 0.0133 | 67.47 | 13.82 |
| *Ichnocarpus frutescens* (L.)W. T. Aiton (C ) |  | 304.00 |  | 0.0089 |  | 6.91 |
| *Lantana camara*L. | 112.00 | 16042.67 | 0.0222 | 2.2453 | 64.09 | 262.35 |
| *Maytenus emarginata* (Willd.) | 144.00 | 96.00 | 0.1778 | 0.0803 | 34.40 | 8.89 |
| *Phyllodium pulchellum* (L.) | 48.00 |  | 0.0026 |  | 6.41 |  |
| *Solanum anguivi* Lam*.* | 288.00 |  | 0.0257 |  | 52.33 |  |
| [*Ventilago calyculata*Tul*.*](http://www.theplantlist.org/tpl/record/kew-2451795) | 21.33 | 5.33 | 0.0592 | 0.0042 | 25.14 | 0.92 |
| *Xanthium strumarium*L. | 32.00 | 58.67 | 0.0055 | 0.0113 | 16.98 | 3.79 |
| *Ziziphus oenoplia* (L.)Miller | 5.33 |  | 0.0066 |  | 3.88 |  |
| **Herbs** |  |  |  |  |  |  |
| *Acanthospermum hispidum* DC. |  | 133.33 |  | 0.0013 |  | 0.28 |
| *Achyranthes aspera* L. | 1333.33 | 866.67 | 0.0921 | 0.0542 | 2.69 | 1.83 |
| *Ageratum conyzoides* L. | 20400.00 | 7466.67 | 0.3170 | 0.1522 | 14.75 | 10.69 |
| *Alternanthera sessilis* (L.) R. Br. ex DC. | 5000.00 | 4466.67 | 0.1413 | 0.1186 | 5.00 | 7.35 |
| *Alysicarpus longifolius* Sensu Span., non Wight & Arn. | 7733.33 | 1400.00 | 0.0673 | 0.0148 | 4.85 | 2.16 |
| *Alysicarpus monilifer* (L.) DC. | 3333.33 | 1533.33 | 0.0276 | 0.0182 | 2.51 | 1.63 |
| *Andrographis echioides (*L.*)*Nees | 1266.67 | 66.67 | 0.0073 | 0.0004 | 1.42 | 0.13 |
| *Anisochilus carnosus* (L.f.) Wall. | 400.00 |  | 0.0063 |  | 0.57 |  |
| *Apluda mutica*L. | 3800.00 | 5200.00 | 0.0141 | 0.0180 | 1.73 | 3.51 |
| *Aristida depressa* Retz. | 3866.67 |  | 0.0086 |  | 1.61 |  |
| *Aristolochia indica*L*.* | 66.67 |  | 0.0034 |  | 0.17 |  |
| *Axonopus compressus* (Sw.) P.Beauv. | 333.33 |  | 0.0029 |  | 0.27 |  |
| *Bidens biternata* (Lour.)Merr.*&*Sherff | 2333.33 | 2600.00 | 0.1295 | 0.1662 | 3.15 | 5.72 |
| *Biophytum sensitivum* (L.) DC. var. sesbanioides | 5200.00 | 533.33 | 0.1764 | 0.0242 | 5.91 | 1.16 |
| *Blumea lacera* (Burm.f.) DC. | 3400.00 | 133.33 | 0.1107 | 0.0054 | 3.68 | 0.39 |
| *Cajanus scarabaeoides* (L.) Thouars | 1133.33 |  | 0.0120 |  | 1.03 |  |
| *Cassia pumila*Lam. | 9133.33 | 1666.67 | 0.1905 | 0.0189 | 8.36 |  |
| *Cassia tora*L. | 23600.00 | 17200.00 | 1.3538 | 0.8506 | 30.58 | 28.95 |
| *Centella asiatica* (L.) Urb. | 200.00 |  | 0.0003 |  | 0.19 |  |
| *Cissampelos pareira*L | 2200.00 | 1066.67 | 0.0193 | 0.0128 | 1.84 | 2.04 |
| *Cocculus hirsutus* (L.)Diels | 400.00 |  | 0.0038 |  | 0.50 |  |
| *Commelina benghalensis*L. | 666.67 | 66.67 | 0.0061 | 0.0007 | 0.89 | 0.16 |
| *Conyza canadensis* (L.) Cronquist | 66.67 |  | 0.0003 |  | 0.10 |  |
| *Corchorus trilocularis*L. | 3666.67 | 666.67 | 0.1135 | 0.0184 | 4.24 | 1.32 |
| *Crotolaria juncea* L. | 66.67 |  | 0.0042 |  | 0.15 |  |
| *Curculigo orchioides*Gaertn | 2466.67 | 333.33 | 0.0699 | 0.0093 | 2.99 | 0.89 |
| *Cynodon dactylon* (L.)Pers. | 17600.00 | 4333.33 | 0.0742 | 0.0251 | 6.22 | 3.26 |
| *Cynoglossum furcatum* Wall. | 133.33 |  | 0.0032 |  | 0.21 |  |
| *Cyperus rotundus* L. | 1666.67 | 733.33 | 0.0135 | 0.0067 | 1.53 | 1.18 |
| *Dactyloctenium aegyptium* (L.)Willd. | 733.33 | 200.00 | 0.0050 | 0.0011 | 0.83 | 0.20 |
| *Desmodium triflorum* (L.) DC. | 60066.67 | 25266.67 | 0.2542 | 0.1078 | 21.92 | 16.82 |
| *Dichanthium annulatum* (Forssk.) Stapf. | 1066.67 | 1000.00 | 0.0053 | 0.0057 | 0.68 | 0.83 |
| *Digitaria sanguinalis* (L.) Scop. | 866.67 |  | 0.0092 |  | 0.51 |  |
| *Elephantopus scaber* Auct. non L. | 3133.33 | 3000.00 | 0.1458 | 0.1315 | 5.03 | 7.19 |
| *Eleusine indica* (L.) Gaertn. | 2666.67 | 533.33 | 0.0127 | 0.0023 | 1.49 | 0.47 |
| *Emilia sonchifolia* (L.) DC. ex Wight | 733.33 | 66.67 | 0.0027 | 0.0002 | 0.64 | 0.12 |
| *Eragrostis unioloides* (Retz.) Nees ex Steud | 1400.00 | 333.33 | 0.0037 | 0.0005 | 0.88 | 0.24 |
| *Euphorbia hirta*L. | 5733.33 | 3733.33 | 0.1173 | 0.0640 | 5.61 | 5.15 |
| *Euphorbia hypericifolia*L. | 466.67 |  | 0.0055 |  | 0.41 |  |
| *Evolvulus alsinoides* (L.) | 133.33 |  | 0.0009 |  | 0.12 |  |
| *Evolvulus nummularius* (L.) | 23733.33 | 12266.67 | 0.0571 | 0.0338 | 10.47 | 8.16 |
| *Heteropogon contortus (*L.*)*P.Beauv.*ex*Roem.*&*Schult. | 10400.00 | 7733.33 | 0.0866 | 0.0552 | 5.01 | 5.56 |
| *Hibiscus lobatus* (Murray) Kuntze | 733.33 | 133.33 | 0.0204 | 0.0013 | 0.99 | 0.33 |
| *Hyptis suaveolens* (L.) Poit. | 733.33 | 2000.00 | 0.0356 | 0.0892 | 1.34 | 3.16 |
| *Indigofera cordifolia*Roth | 200.00 |  | 0.0030 |  | 0.32 |  |
| [*Ionidium suffruticosum* (L.) Ging. in DC.](https://indiabiodiversity.org/species/show/252226) |  | 133.33 |  | 0.0015 |  | 0.18 |
| *Ipomoea cairica* (L.) Sweet |  | 400.00 |  | 0.0032 |  | 0.89 |
| *Justicia quinqueangularis* Koen. ex Roxb. | 7800.00 | 1933.33 | 0.0663 | 0.0190 | 5.43 | 2.84 |
| *Lindernia ciliata*(Colsm.)Pennell | 733.33 |  | 0.0385 |  | 0.84 |  |
| *Lindernia crustacea*(L.) F. Muell. | 2866.67 |  | 0.0189 |  | 1.19 |  |
| *Melothria heterophylla*(Lour.) *Cogn.* | 133.33 |  | 0.0009 |  | 0.16 |  |
| *Merremia emarginata* (Burm. fil.)Hall*.*fil. | 133.33 |  | 0.0003 |  | 0.16 |  |
| *Mollugo oppositifolia*L. | 133.33 | 66.67 | 0.0018 | 0.0009 | 0.26 | 0.14 |
| *Oldenlandia herbacea* (L.) | 400.00 |  | 0.0008 |  | 0.22 |  |
| *Oplismenus burmannii* (Retz.) P.Beauv. | 95133.33 | 94600.00 | 0.2416 | 0.2267 | 33.69 | 48.97 |
| *Parthenium hysterophorus*L. | 3400.00 | 1666.67 | 0.2285 | 0.1706 | 4.30 | 4.34 |
| *Peristrophe paniculata* (Forssk.) R.K. Brummitt | 333.33 |  | 0.0029 |  | 0.20 |  |
| *Phyllanthus fraternus*G.L.Webster | 333.33 |  | 0.0059 |  | 0.41 |  |
| *Phyllanthus niruri*L. | 600.00 |  | 0.0323 |  | 1.12 |  |
| *Phyllanthus urinaria*L. | 1666.67 | 333.33 | 0.0165 | 0.0020 | 1.37 | 0.48 |
| *Phyllanthus* *simplex* Retz. | 2800.00 | 466.67 | 0.0374 | 0.0063 | 2.49 | 0.75 |
| *Physalis minima*L. | 266.67 |  | 0.0120 |  | 0.51 |  |
| *Polygala chinensis* L. | 333.33 |  | 0.0016 |  | 0.31 |  |
| *Ruellia tuberosa*L*.* | 7133.33 | 8333.33 | 0.1452 | 0.1671 | 6.93 | 11.95 |
| *Rungia pectinata* (L.) | 29200.00 | 18466.67 | 0.2863 | 0.1940 | 17.80 | 19.08 |
| *Setaria viridis* (L.) P.Beauv*.* | 1200.00 | 400.00 | 0.0075 | 0.0017 | 0.82 | 0.45 |
| *Sida acuta*Burm. f. |  | 7600.00 |  | 0.4005 |  | 17.66 |
| *Sida cordifolia*L. | 26533.33 | 24200.00 | 0.9014 | 0.8586 | 27.57 | 37.94 |
| *Sida rhombifolia*L. |  | 866.67 |  | 0.0398 |  | 2.52 |
| *Spermacoce hispida* Linn | 866.67 |  | 0.0058 |  | 0.93 |  |
| *Spigelia anthelmia* L. | 466.67 | 66.67 | 0.0037 | 0.0004 | 0.61 | 0.14 |
| *Sporobolus diander* (Retz.)Beauv. | 5933.33 | 2666.67 | 0.0086 | 0.0043 | 2.22 | 1.52 |
| *Themeda triandra*Forssk. | 7933.33 | 2200.00 | 0.0382 | 0.0106 | 3.28 | 1.69 |
| *Tridax procumbens* L. | 7000.00 | 6000.00 | 0.2326 | 0.1649 | 7.55 | 9.92 |
| *Triumfetta rhomboidea*Jacq. | 11800.00 | 6400.00 | 0.6312 | 0.3197 | 14.13 | 11.49 |
| *Urena lobata*L. |  | 600.00 |  | 0.1526 |  | 2.73 |
| *Vernonia cinera* (L.) | 1200.00 | 200.00 | 0.0259 | 0.0034 | 1.27 | 0.25 |
| *Zornia diphylla* (L.)Pers. | 1266.67 | 133.33 | 0.0058 | 0.0011 | 0.88 | 0.16 |
